# Supplementary material for: The role of OCO-3 XCO 2 retrievals in estimating global terrestrial net ecosystem exchanges
Source: Copernicus journal article supplement (doi:10.5194/acp-25-867-2025), 2025-01-22
Supplement: Supplementary file 1 [file acp-25-867-2025-supplement.pdf]

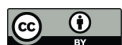

*Supplement of*

## **The role of OCO-3 XCO<sub>2</sub> retrievals in estimating global terrestrial net ecosystem exchanges**

**Xingyu Wang et al.**

*Correspondence to:* Fei Jiang ([jiangf@nju.edu.cn](mailto:jiangf@nju.edu.cn))

The copyright of individual parts of the supplement might differ from the article licence.

**TableS1.** Additional assimilation experiments conducted in this study

| Name        | XCO <sub>2</sub>                                                                                                |
|-------------|-----------------------------------------------------------------------------------------------------------------|
| Exp_OCO3L   | LNLG of OCO-3 XCO <sub>2</sub> retrievals                                                                       |
| Exp_OCO2L   | LNLG of OCO-2 XCO <sub>2</sub> retrievals                                                                       |
| Exp_OCO3&2L | LNLG of OCO-3 and OCO-2 XCO <sub>2</sub> retrievals                                                             |
| Exp_OCO2r   | Only the OCO-2 XCO <sub>2</sub> retrievals located between 52°S and 52°N retrievals were assimilated            |
| Exp_OCO3tc  | All the observation times of the OCO-3 XCO <sub>2</sub> retrievals were changed to 1.30 p.m. local time         |
| Exp_OCO3ts  | Only OCO-3 XCO <sub>2</sub> retrievals with observation times between 12 and 3 p.m. local time were assimilated |

**Table S2.** Global carbon budget estimated in the additional inversion experiments (PgC yr<sup>-1</sup>).

| Exp. Name   | FOSSIL emissions | FIRE emissions | NEE   | OCN fluxes | Global net carbon fluxes | Observed global CO <sub>2</sub> growth rates |
|-------------|------------------|----------------|-------|------------|--------------------------|----------------------------------------------|
| Exp_OCO3L   |                  |                | -3.33 | -2.77      | 5.58                     |                                              |
| Exp_OCO2L   |                  |                | -3.91 | -2.83      | 4.93                     |                                              |
| Exp_OCO3&2L | 9.71             | 1.97           | -3.89 | -2.8       | 4.98                     | 4.93                                         |
| Exp_OCO2r   |                  |                | -3.63 | -2.64      | 5.41                     |                                              |
| Exp_OCO3tc  |                  |                | -3.88 | -2.84      | 4.96                     |                                              |
| Exp_OCO3ts  |                  |                | -3.11 | -2.72      | 5.85                     |                                              |

**Table S3.** Regional NEE estimated from the additional experiments

| Regions                         | Exp_<br>OCO3L | Exp_<br>OCO2L | Exp_<br>OCO3&2L | Exp_<br>OCO2r | Exp_<br>OCO3tc | Exp_<br>OCO3t2 |
|---------------------------------|---------------|---------------|-----------------|---------------|----------------|----------------|
| Boreal North<br>America         | -0.25         | -0.35         | -0.32           | -0.26         | -0.35          | -0.31          |
| Temperate<br>North<br>America   | -0.21         | 0.04          | -0.25           | -0.34         | -0.01          | -0.12          |
| Tropical<br>South<br>America    | -0.3          | -0.24         | -0.1            | -0.3          | -0.22          | -0.47          |
| Temperate<br>South<br>America   | -0.02         | -0.4          | -0.28           | -0.06         | -0.41          | -0.02          |
| Northern<br>Africa              | -0.08         | -0.02         | -0.01           | -0.11         | -0.02          | -0.12          |
| Southern<br>Africa              | -0.27         | -0.49         | -0.51           | -0.29         | -0.47          | -0.19          |
| Boreal Asia                     | -0.41         | -0.51         | -0.32           | -0.4          | -0.49          | -0.41          |
| Temperate<br>Asia               | -0.31         | -0.33         | -0.32           | -0.33         | -0.31          | -0.34          |
| Tropical Asia                   | -0.31         | -0.36         | -0.32           | -0.31         | -0.35          | -0.35          |
| Australia                       | -0.21         | -0.14         | -0.23           | -0.24         | -0.14          | -0.12          |
| Europe                          | -0.85         | -1.02         | -1.12           | -0.88         | -1.02          | -0.52          |
| Northern<br>Hemisphere<br>lands | -2.02         | -2.17         | -2.33           | -2.22         | -2.17          | -1.71          |
| Tropical<br>lands               | -0.95         | -1.09         | -0.94           | -1.00         | -1.05          | -1.13          |
| Southern<br>Hemisphere<br>lands | -0.24         | -0.54         | -0.52           | -0.30         | -0.55          | -0.14          |

**Table S4.** Error statistics between the simulated CO<sub>2</sub> concentrations and surface flask observations of the additional experiments (ppm)

| Exp. Name   | Bias | Mae  | Rmse |
|-------------|------|------|------|
| Exp_OCO3L   | 0.35 | 2.47 | 4.58 |
| Exp_OCO2L   | 0.14 | 2.47 | 4.54 |
| Exp_OCO3&2L | 0.16 | 2.35 | 4.46 |
| Exp_OCO2r   | 0.23 | 2.42 | 4.59 |
| Exp_OCO3tc  | 0.00 | 2.44 | 4.50 |
| Exp_OCO3ts  | 0.23 | 2.59 | 4.68 |

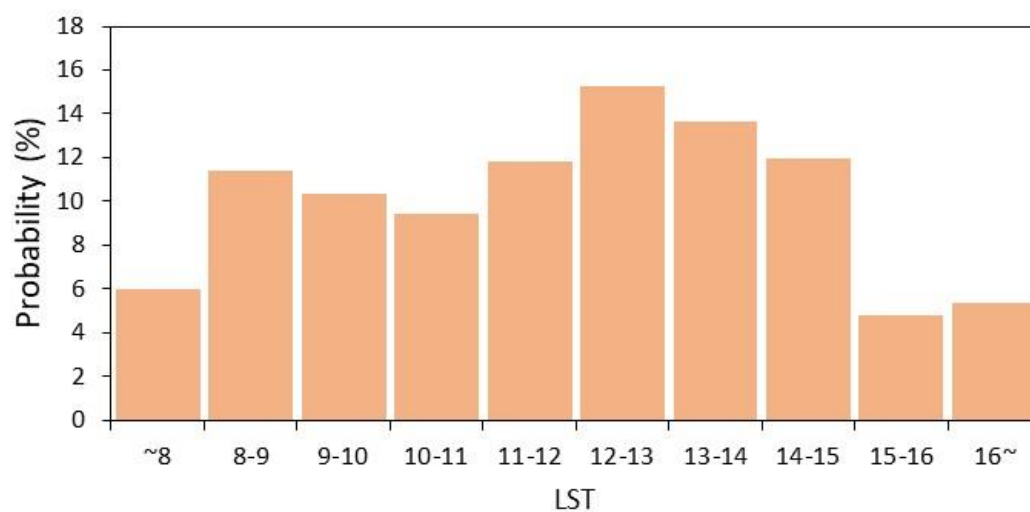

**Figure S1.** Probability distribution of the observation time of OCO-3 satellite in East China

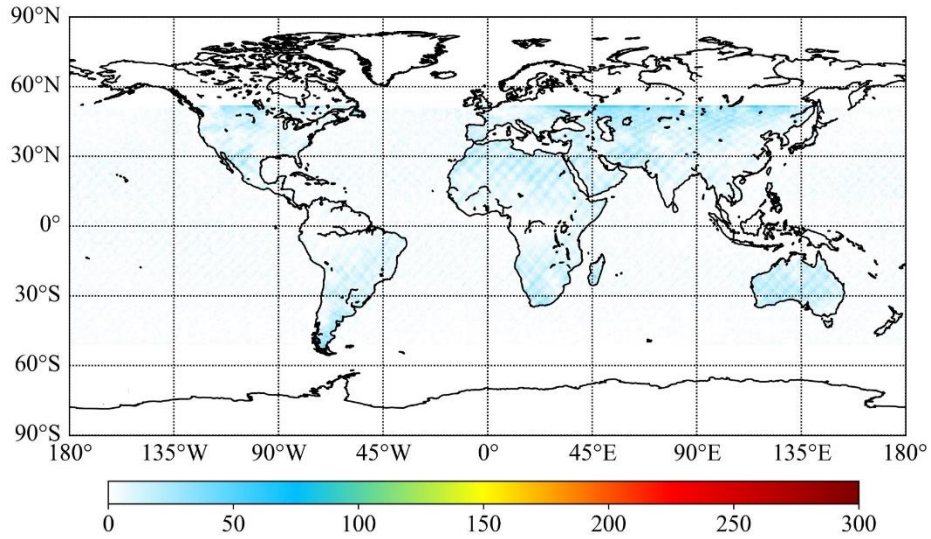

**Figure S2.** Data amount (the sum of 2020-2022) of OCO-3 XCO<sub>2</sub> in each grid cell (land, 1°× 1°; ocean, 5°× 5°) and at each latitude with observation time between 12 and 3 p.m. LST

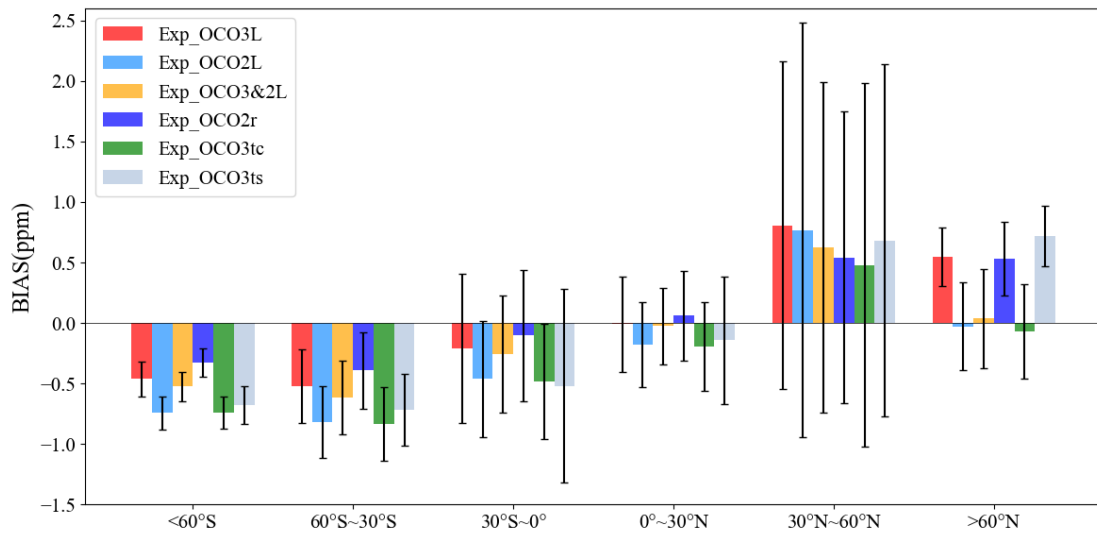

**Figure S3.** The posterior CO<sub>2</sub> BIAS at different latitudinal zones of the additional experiments

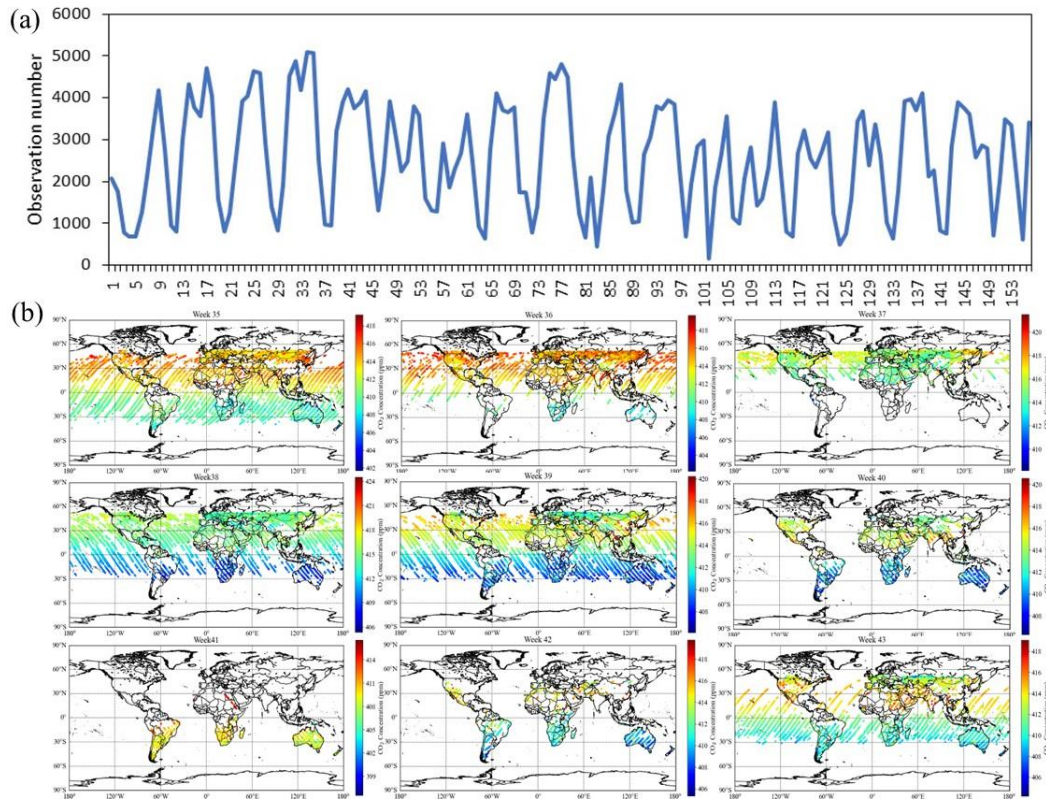

**Figure S4.** Temporal variations of the OCO-3 observation number (a, weekly number of global observations from Jan 2020 to Dec 2022; b, spatial distribution of global observations for 9 consecutive weeks; re-gridded data (land,  $1^\circ \times 1^\circ$ ; ocean,  $5^\circ \times 5^\circ$ ) was used in this plot)

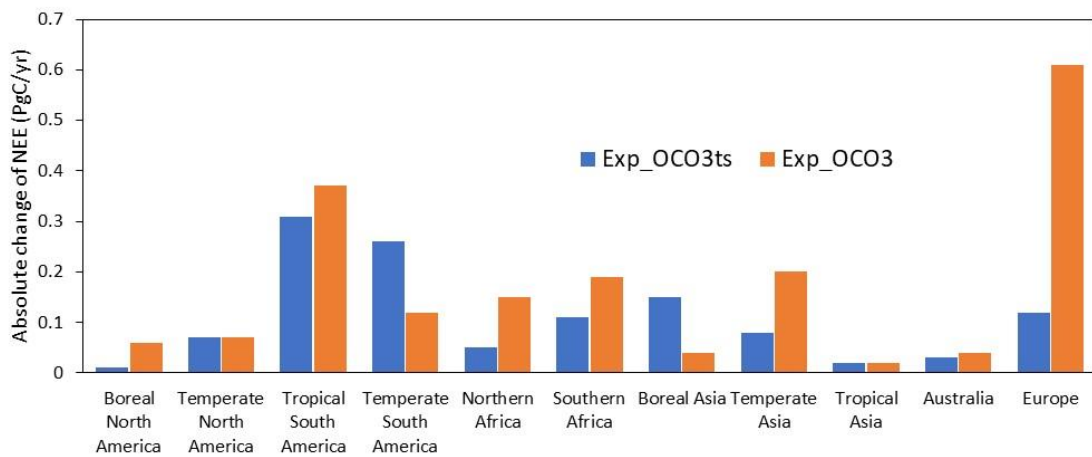

**Figure S5.** Absolute changes of NEE compared to the a priori
